# Supplementary material for: The role of autophagy during murine primordial follicle assembly
Source: publisher site journal article supplement (doi:10.18632/aging.101376), 2018-02-05
Supplement: Supplementary file [file aging-v10i2-101376-supplementary-material-SD1.pdf]

## SUPPLEMENTARY MATERIAL

**Table S1. Primers used for quantitative RT-PCR.**

| Gene          | Genbank     | Forward primer sequence | Reverse primer sequence  | Product Length(bp) |
|---------------|-------------|-------------------------|--------------------------|--------------------|
| <i>Nobox</i>  | NM_130869.3 | CTATCCTGACAGTGACAAACGCC | CACCCTCTCAGCACCCCTCATTAT | 251                |
| <i>Lhx8</i>   | NC_000069.5 | CAGTTCGCTCAGGACAACAA    | CCTGCAGTTCTGAAACCACA     | 105                |
| <i>Sohlh2</i> | NM_028937.3 | TCTCAGCCACATCACAGAGG    | GGGGACGCGAGTCTTATACA     | 199                |
| <i>Figla</i>  | NM_012013.1 | ACAGAGCAGGAAGCCAGTA     | TGGGTAGCATTTCCCAAGAG     | 225                |
| <i>Bax</i>    | NM_007527   | ATGCGTCCAAGGAAGACTGAG   | CCCCAGTTGAAGTTGCCATCAG   | 162                |
| <i>Bcl-2</i>  | NM_009741   | GCAGAGATGTCCAGTCAG      | CACCGAACTCAAAGAAGG       | 127                |
| <i>Actin</i>  | NM_007393.3 | TCGTGGGCCGCTCTAGGCAC    | TGGCCTTAGGGTTCAGGGGGG    | 255                |

**Table S2. Antibodies.**

| Antibody            | Vendor                   | Dilution              |
|---------------------|--------------------------|-----------------------|
| MVH(IHC)            | Abcam (ab13840)          | 1:200                 |
| MVH(Double IF)      | mAbcam (ab27591)         | 1:200                 |
| LC3B (WB)           | Sigma (102M4778V)        | 1:1000                |
| LC3B (IHC)          | Abcam (ab51520)          | 1:1000                |
| NOBOX (IHC and WB)  | Abcam (ab41521)          | 1:1000(WB)/1:200(IHC) |
| BAX (WB)            | Cell Signaling (#2772S)  | 1:1000                |
| BCL-2 (WB)          | Immuno Way (YT0470)      | 1:1000                |
| BECLIN1 (WB)        | Cell Signaling (#3738)   | 1:1000                |
| $\beta$ -ACTIN (WB) | Boster (BM0627)          | 1:1000                |
| CPT1A               | Proteintech (15184-1-AP) | 1:1000                |
